# Supplementary material
Source: publisher site journal article supplement (https://www.dovepress.com/get_supplementary_file.php?f=298450.docx)
Supplement: Supplementary file 1 [file get_supplementary_file.php]

**Supplementary Figure Legend**

**Figure S1:** Normal probability plots of the standardized residual (A) and Pareto charts of the standardized effect (B).

**Note:** The red dotted line represents α = 0.05.


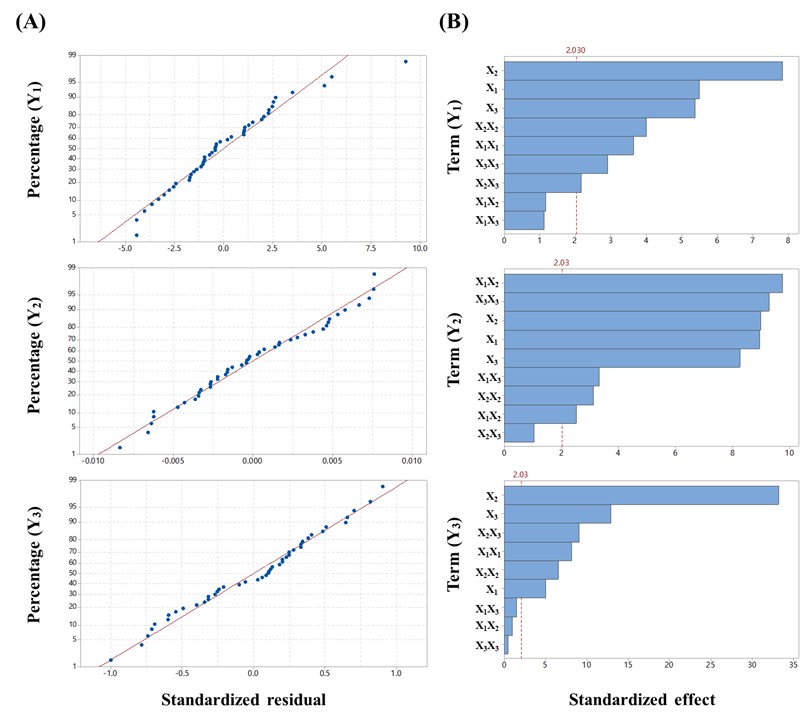


**Table S1** Result of analysis of variance for each parameter

| Source | DF | Y1 (DE30) | | |  | Y2 (DEC) | | |  | Y3 (CI) | | |
| --- | --- | --- | --- | --- | --- | --- | --- | --- | --- | --- | --- | --- |
| SS | F | *p*-value |  | SS | F | *p*-value |  | SS | F | *p*-value |
| Model | 9 | 1576.29 | 18.57 | < 0.001 |  | 0.009534 | 48.30 | < 0.001 |  | 402.43 | 164.55 | < 0.001 |
| X1 | 1 | 284.69 | 30.19 | < 0.001 |  | 0.001751 | 79.84 | < 0.001 |  | 6.93 | 25.52 | < 0.001 |
| X2 | 1 | 578.50 | 61.35 | < 0.001 |  | 0.001768 | 80.62 | < 0.001 |  | 298.92 | 1100.03 | < 0.001 |
| X3 | 1 | 273.17 | 28.97 | < 0.001 |  | 0.001488 | 67.86 | < 0.001 |  | 45.38 | 166.98 | < 0.001 |
| X12 | 1 | 124.28 | 13.18 | 0.001 |  | 0.002077 | 94.72 | < 0.001 |  | 18.01 | 66.27 | < 0.001 |
| X22 | 1 | 151.13 | 16.03 | < 0.001 |  | 0.000213 | 9.73 | 0.004 |  | 11.34 | 42.83 | < 0.001 |
| X32 | 1 | 80.33 | 8.52 | 0.006 |  | 0.00188 | 85.72 | < 0.001 |  | 0.05 | 0.18 | 0.673 |
| X1X2 | 1 | 13.06 | 1.39 | 0.247 |  | 0.00014 | 6.39 | 0.016 |  | 0.27 | 0.99 | 0.326 |
| X1X3 | 1 | 12.04 | 1.28 | 0.266 |  | 0.000243 | 11.08 | 0.002 |  | 0.61 | 2.24 | 0.144 |
| X2X3 | 1 | 44.58 | 4.73 | 0.037 |  | 0.000024 | 1.10 | 0.302 |  | 22.14 | 81.48 | < 0.001 |
| Residual | 35 | 330.03 | - | - |  | 0.000768 | - | -- |  | 9.51 | - | -- |
| Pure error | 32 | 321.40 | - | - |  | 0.000706 | - | - |  | 8.10 | - | - |
| Total | 44 | 1906.32 | - | - |  | 0.010302 | - | - |  | 411.97 | - | - |

**Notes:** X1: G44:BL4, X2: FLO, X3: VP105.

**Abbreviations:** DF, degrees of freedom; SS, sum of squares, DE30, dissolution efficiency at 30 min; DEC, dissolution enhancing capacity; CI, Carr’s index.
